# Supplementary material for: Preparation of Zn–Co–O mixed-metal oxides nanoparticles through a facile coordination polymer based process
Source: Royal Society of Chemistry journal article supplement (doi:10.1039/c3ra22913k), 2013-01-01
Supplement: c3ra22913k.pdf [file c3ra22913k.pdf]

## Electronic Supplementary Information

### Preparation of Zn-Co-O mixed-metal oxides nanoparticles through a facile coordination polymer based process

Jiao Zhao,<sup>a</sup> Yuliang Zhang,<sup>a,b</sup> Panpan Su,<sup>a,b</sup> Zongxuan Jiang,<sup>a</sup> Qihua Yang,<sup>\*,a</sup> and

Can Li<sup>\*,a</sup>

<sup>a</sup> State Key Laboratory of Catalysis, Dalian Institute of Chemical Physics, Chinese Academy of Sciences, 457 Zhongshan Road, Dalian 116023, China.

<sup>b</sup> Graduate School of the Chinese Academy of Sciences, Beijing 100049, China.

\* To whom correspondence should be addressed.

E-mail: [yangqh@dicp.ac.cn](mailto:yangqh@dicp.ac.cn) (Q.H.Y.); [canli@dicp.ac.cn](mailto:canli@dicp.ac.cn) (C.L.).

Tel: 86-411-84379552 (Q.H.Y.); 86-411-84379070 (C.L.).

Fax: 86-411-84694447.

URL: <http://www.hmm.dicp.ac.cn> (Q.H.Y.); <http://www.canli.dicp.ac.cn> (C.L.).

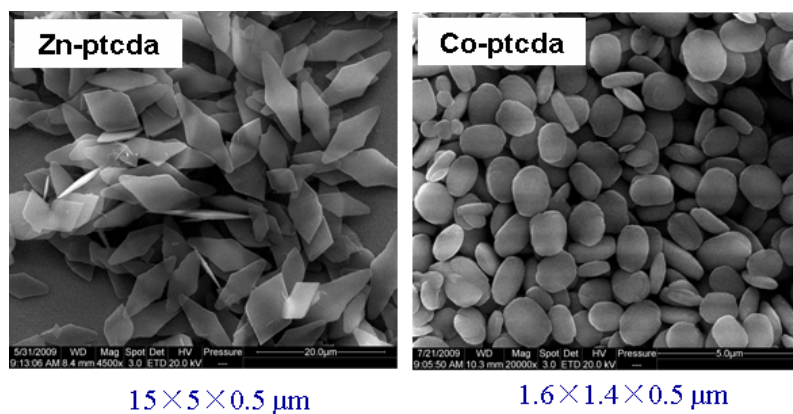

Figure S1. SEM images of Zn-ptcda and Co-ptcda.

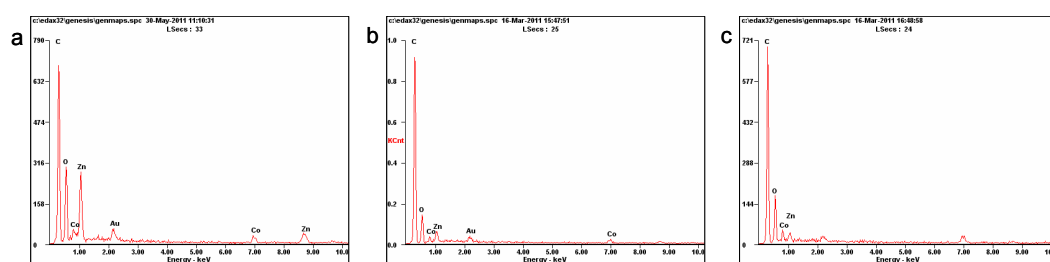

Figure S2. EDX spectra of Zn-Co-ptcda with different Zn/Co molar ratios: (a) Zn/Co=3/1, (b) Zn/Co=1/1, and (d) Zn/Co=1/3.

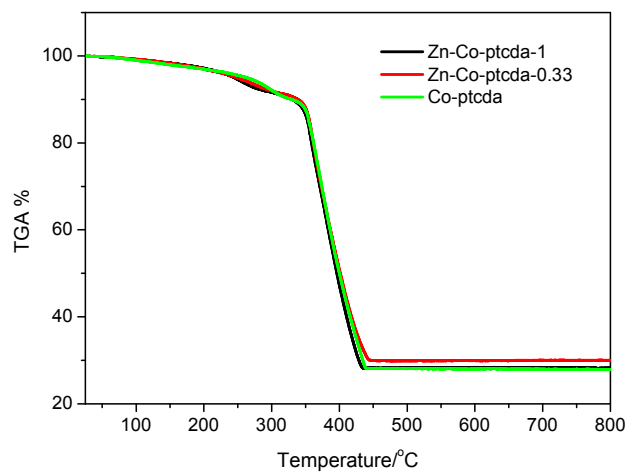

Figure S3. TG profiles of Co-ptcda, Zn-Co-ptcda-1, and Zn-Co-ptcda-0.33.

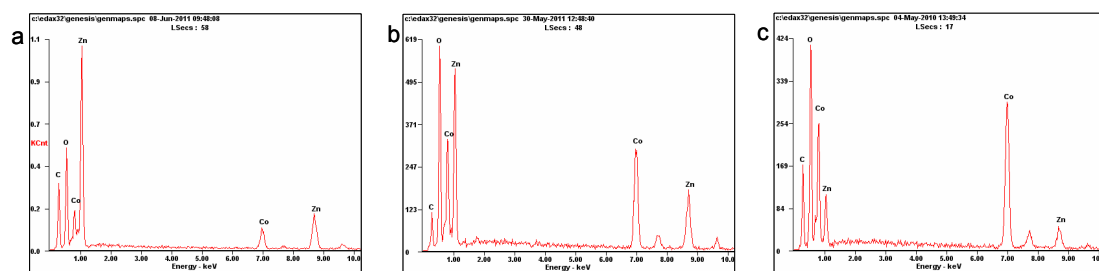

Figure S4. EDX spectra of mixed-metal oxides produced from Zn-Co-ptcda with different Zn/Co molar ratios: (a) Zn/Co=3/1, (b) Zn/Co=1/1, and (c) Zn/Co=1/3.
